# Supplementary figures and images for: Effects of halogen and hydrogen bonding on defect disorder: the ladder that wasn't there
Source: Royal Society of Chemistry journal article supplement (doi:10.1039/c3ce40444g), 2013-01-01

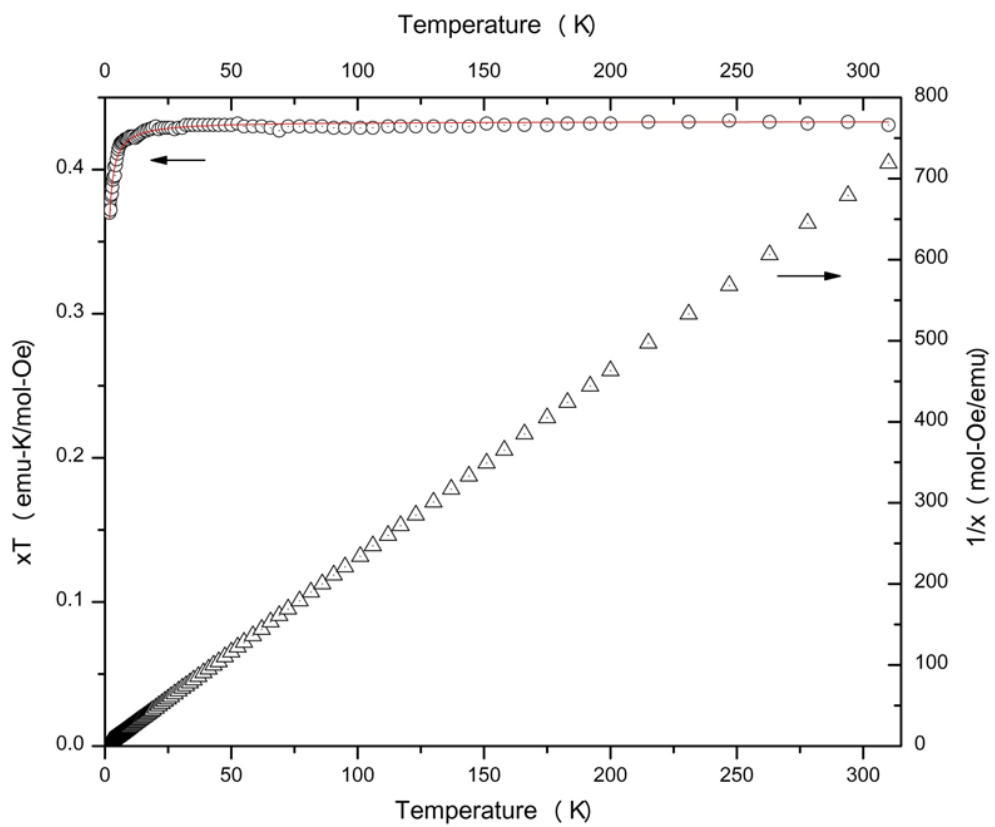

Fig. S1

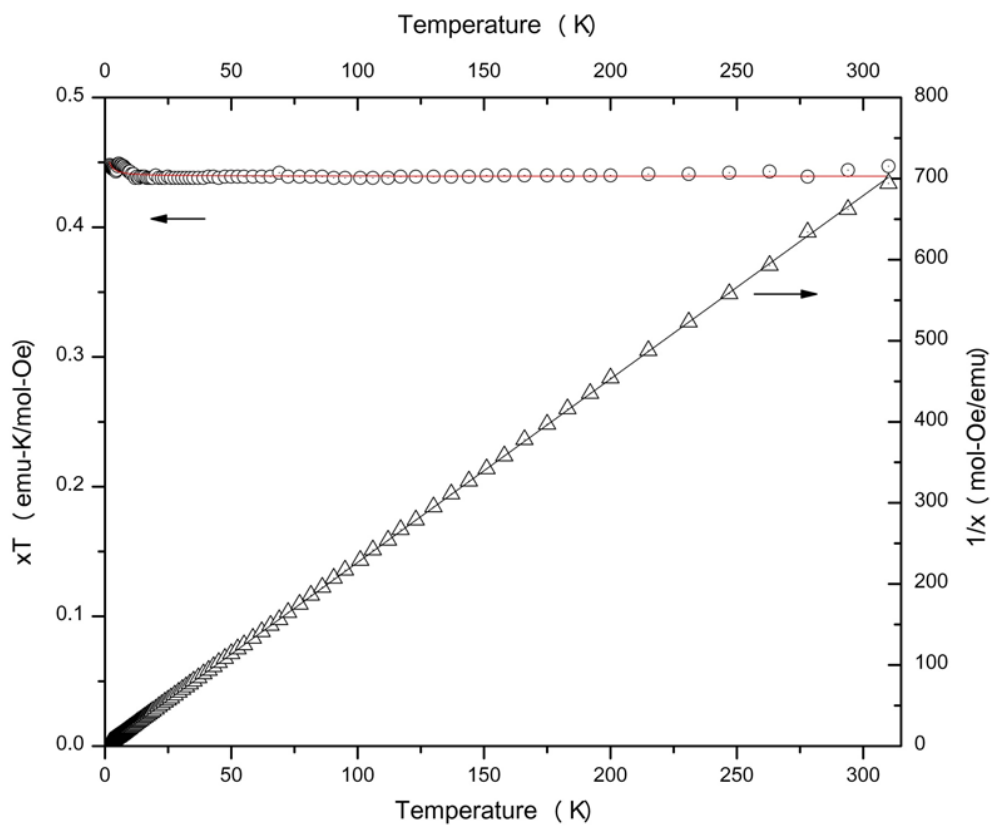

Fig. S2

Supplement: c3ce40444g.pdf [file c3ce40444g.pdf]
